# Supplementary material for: A novel Sm3+ singly doped LiCa3ZnV3O12 phosphor: a potential luminescent material for multifunctional applications
Source: Royal Society of Chemistry journal article supplement (doi:10.1039/c8ra07329e), 2018-01-01
Supplement: c8ra07329e1.pdf [file c8ra07329e1.pdf]

## Electronic Supplementary Information

### **Novel Sm<sup>3+</sup> singly doped LiCa<sub>3</sub>ZnV<sub>3</sub>O<sub>12</sub> phosphor: a potential luminescent material for multifunctional applications**

Heng Guo,<sup>a</sup> Balaji Devakumar,<sup>a</sup> R. Vijayakumar,<sup>a</sup> Peng Du,<sup>b,\*</sup> and Xiaoyong Huang<sup>a,\*</sup>

<sup>a</sup>College of Physics and Optoelectronics, Taiyuan University of Technology, Taiyuan 030024, P. R. China. E-mail: [huangxy04@126.com](mailto:huangxy04@126.com)

<sup>b</sup>Department of Electronic Engineering, Kyung Hee University, Yongin-si, Gyeonggi-do 446-701, Republic of Korea. E-mail: [dp2007good@sina.com](mailto:dp2007good@sina.com)

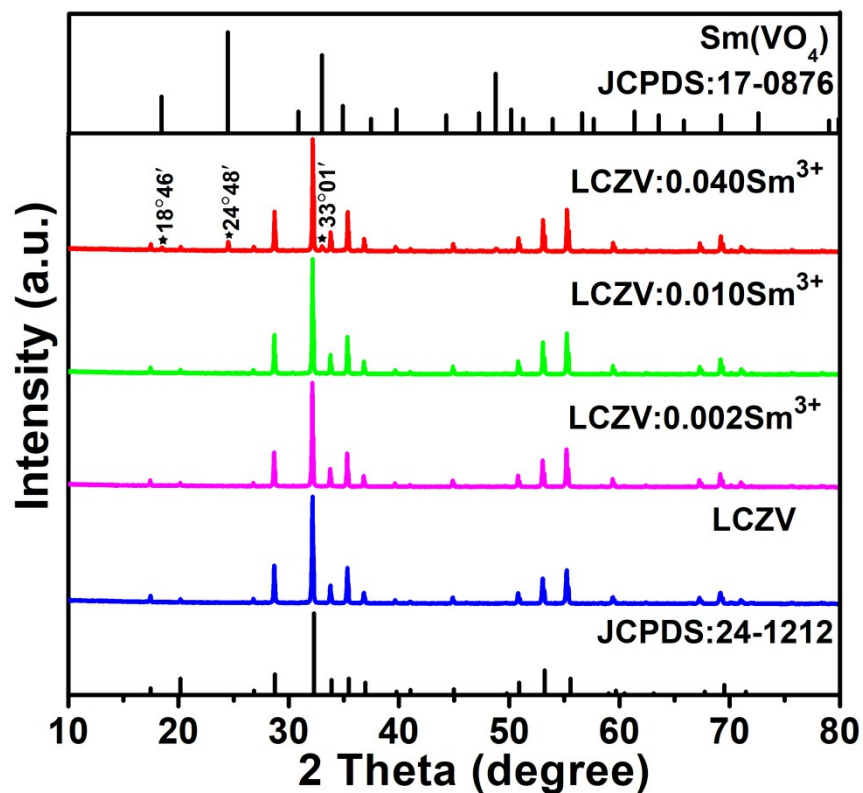

**Figure S1.** XRD patterns of  $\text{LCZV}:x\text{Sm}^{3+}$  ( $x = 0, 0.002, 0.010$  and  $0.040$ ) phosphors. The standard PDF card (LCZV; JCPDS 24-1212) and ( $\text{SmVO}_4$ ; JCPDS 17-0876) were also shown as references.

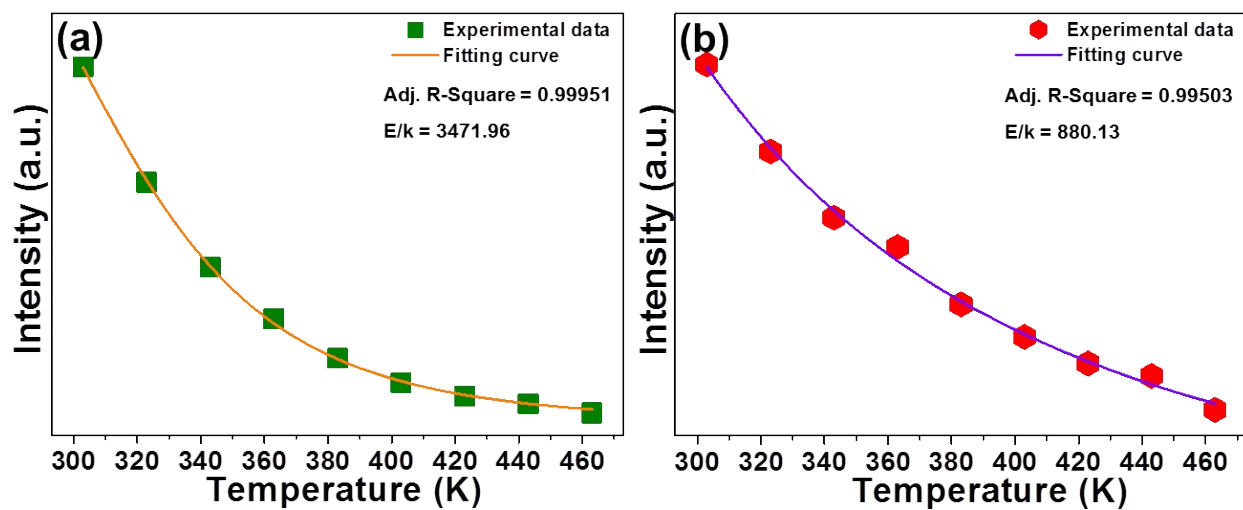

**Figure S2.** Temperature-dependent PL emission intensities of (a)  $\text{VO}_4^{3-}$  group and (b)  $\text{Sm}^{3+}$  ions.

**Table S1.** Refined Crystallographic parameters of LCZV:0.01Sm<sup>3+</sup> phosphor.

| Parameter           | LCZV:0.01Sm <sup>3+</sup>                                           |
|---------------------|---------------------------------------------------------------------|
| Radiation type      | Cu K $\alpha$ radiation with $\lambda = 1.5405 \text{ \AA}$         |
| 2 $\theta$ range    | 10-80°                                                              |
| Crystal symmetry    | Cubic                                                               |
| Space group         | Ia $\bar{3}$ d                                                      |
| Cell parameters     | $a = b = c = 12.4437(1) \text{ \AA}$ $V = 1926.86(3) \text{ \AA}^3$ |
| Reliability factors | $R_{wp} = 4.53\%$ , $R_p = 6.26\%$ $\chi^2 = 2.13$                  |

**Table S2.** Atomic coordinates of LCZV host lattices.

| LiCa <sub>3</sub> ZnV <sub>3</sub> O <sub>12</sub> |          |          |          |      |                                     |         |
|----------------------------------------------------|----------|----------|----------|------|-------------------------------------|---------|
| atom                                               | <i>x</i> | <i>y</i> | <i>z</i> | Occ. | U <sub>iso</sub> (nm <sup>2</sup> ) | Wyckoff |
| Ca1                                                | 0.875    | 0.0      | 0.75     | 1    | 0.0156                              | 24c     |
| Zn1                                                | 0.5      | 0.5      | 0.0      | 0.5  | 0.0088                              | 16a     |
| Li1                                                | 0.5      | 0.5      | 0.0      | 0.5  | 0.00878                             | 16a     |
| V1                                                 | 0.125    | 0.0      | 0.75     | 1    | 0.0035                              | 24d     |
| O1                                                 | 0.03605  | 0.05492  | 0.6562   | 1    | 0.00626                             | 96h     |

**Table S3.** CIE coordinates and CCT of the LCZV: $x\text{Sm}^{3+}$  phosphors.

| Sample      | CIE coordinates ( $x, y$ ) | CCT (K) |
|-------------|----------------------------|---------|
| $x = 0$     | (0.265, 0.361)             | 8690    |
| $x = 0.002$ | (0.321, 0.380)             | 5937    |
| $x = 0.005$ | (0.358, 0.380)             | 4663    |
| $x = 0.01$  | (0.364, 0.388)             | 4211    |
| $x = 0.02$  | (0.389, 0.393)             | 3890    |
| $x = 0.03$  | (0.399, 0.394)             | 3684    |
| $x = 0.04$  | (0.397, 0.395)             | 3738    |
